# Supplementary material for: Factors affecting oxygen evolution through water oxidation on polycrystalline titanium dioxide
Source: Royal Society of Chemistry journal article supplement (doi:10.1039/c6ra06151f), 2016-01-01
Supplement: c6ra06151f1.pdf [file c6ra06151f1.pdf]

Supplementary Information:

**Factors Affecting Oxygen Evolution through Water Oxidation on  
Polycrystalline Titanium Dioxide**

Yuuya Nishimoto<sup>a</sup>, Yuichi Hasegawa<sup>b</sup>, Kenta Adachi<sup>a</sup> and Suzuko Yamazaki<sup>a\*</sup>

<sup>a</sup> Division of Environmental Science and Engineering, Graduate School of Science and Engineering, Yamaguchi University, Yamaguchi 753-8512, Japan

<sup>b</sup> Department of Biology and Chemistry, Faculty of Science, Yamaguchi University, Yamaguchi 753-8512, Japan

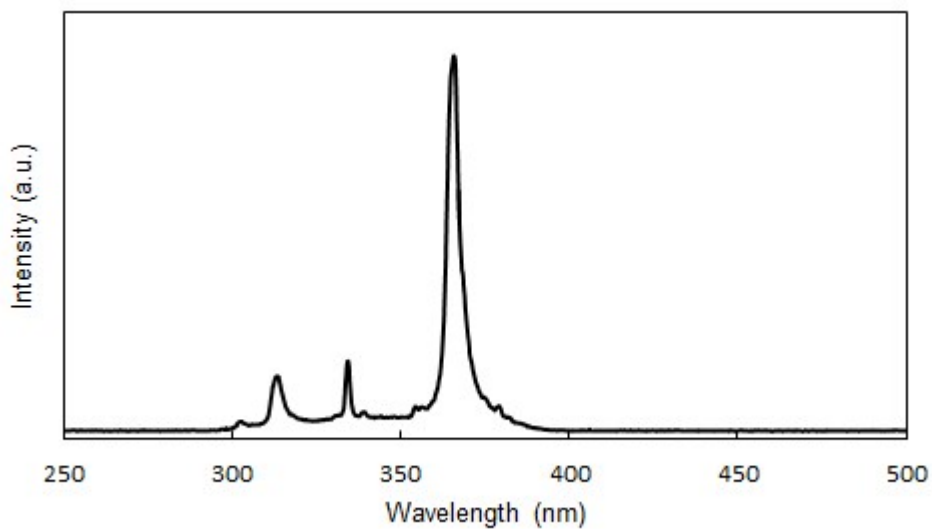

**Fig. S1** Emission spectrum of super-high-pressure Hg lamp through a U330 bandpass filter.

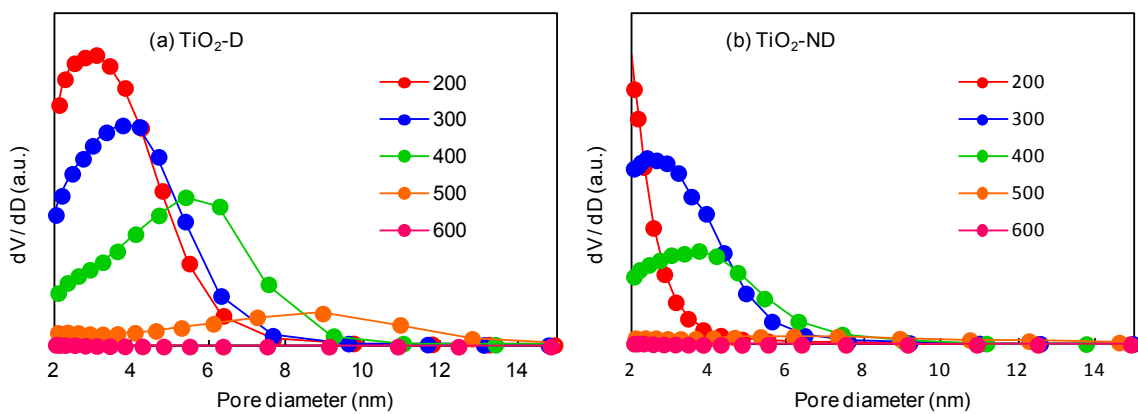

**Fig. S2** Pore size distributions of (a)  $\text{TiO}_2\text{-D}$  and (b)  $\text{TiO}_2\text{-ND}$  calcined at 200–600°C for 2 hours.

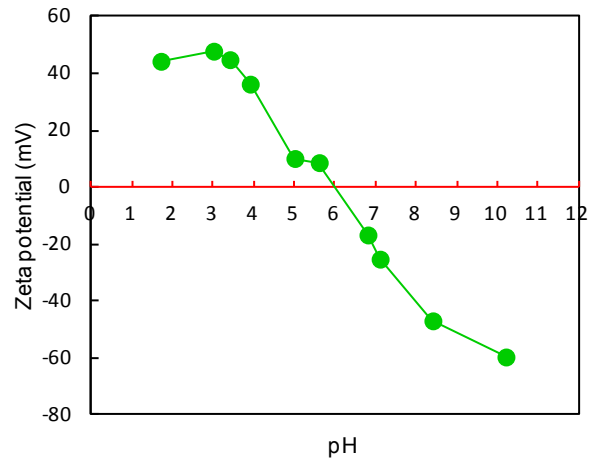

**Fig. S3** Zeta potential of TiO<sub>2</sub> nanocolloid as a function of pH value.

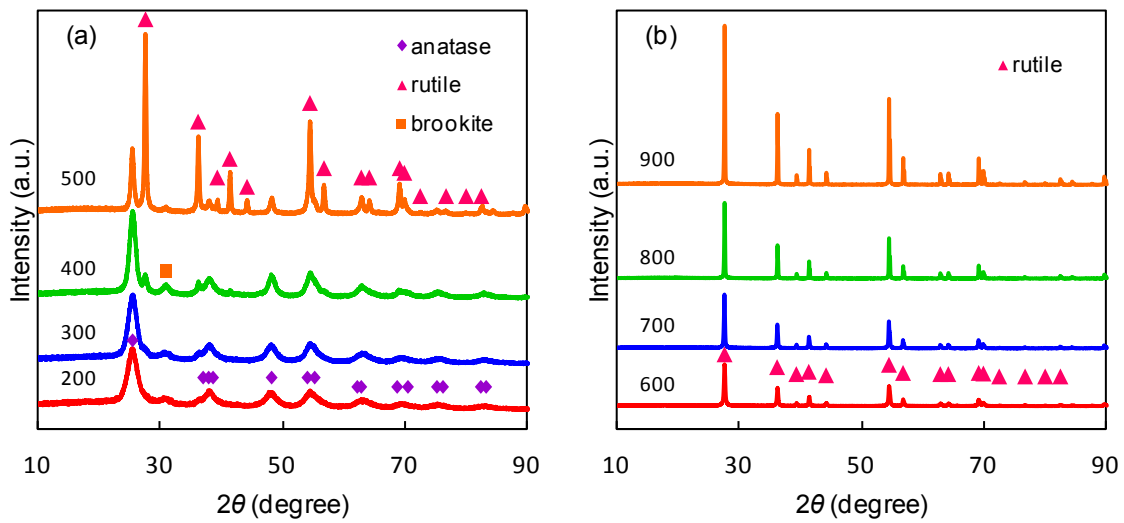

**Fig. S4** XRD patterns of TiO<sub>2</sub>-D calcined at (a) 200–500°C and (b) 600–900°C for 2 hours.

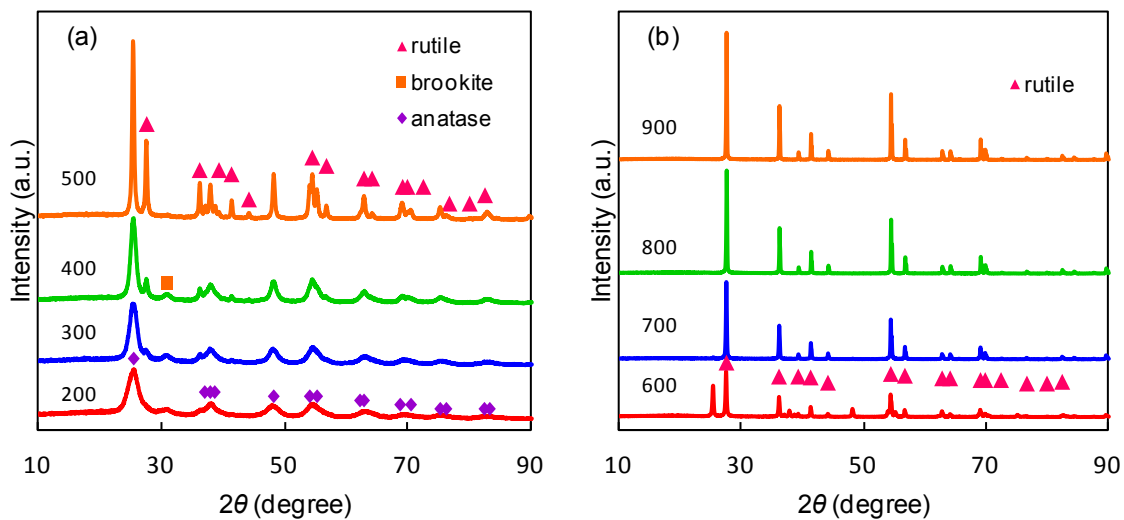

**Fig. S5** XRD patterns of TiO<sub>2</sub>-ND calcined at (a) 200–500°C and (b) 600–900°C for 2 hours.

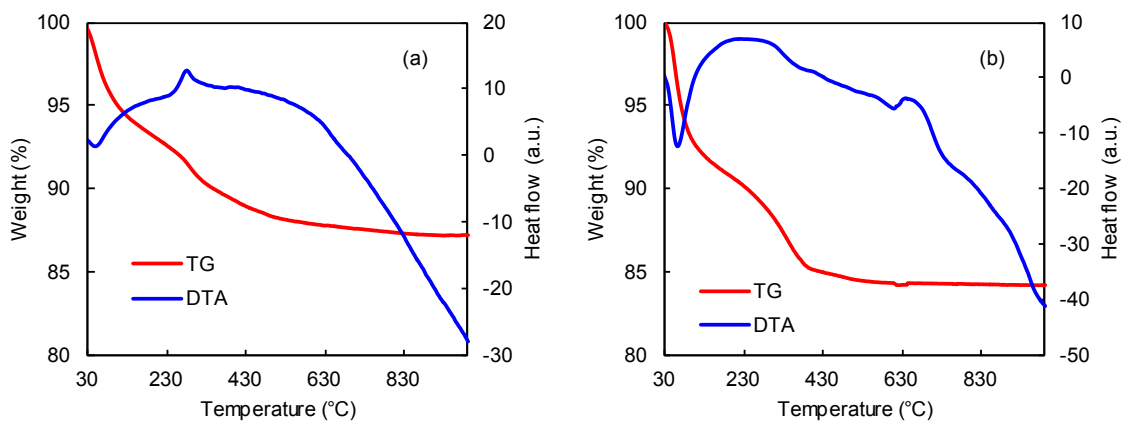

**Fig. S6** TG and DTA curves for (a) TiO<sub>2</sub>-D and (b) TiO<sub>2</sub>-ND calcined at 200°C for 2 hours.

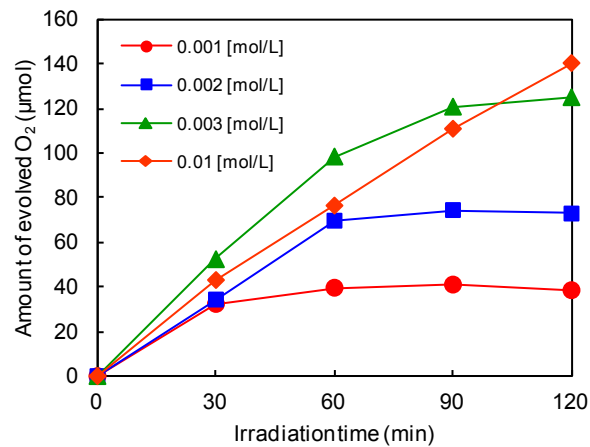

**Fig. S7** Time courses of O<sub>2</sub> evolution from 0.001–0.01 mol L<sup>-1</sup> AgNO<sub>3</sub> solution on TiO<sub>2</sub>-ND calcined at 800°C for 2 hours under UV light irradiation.

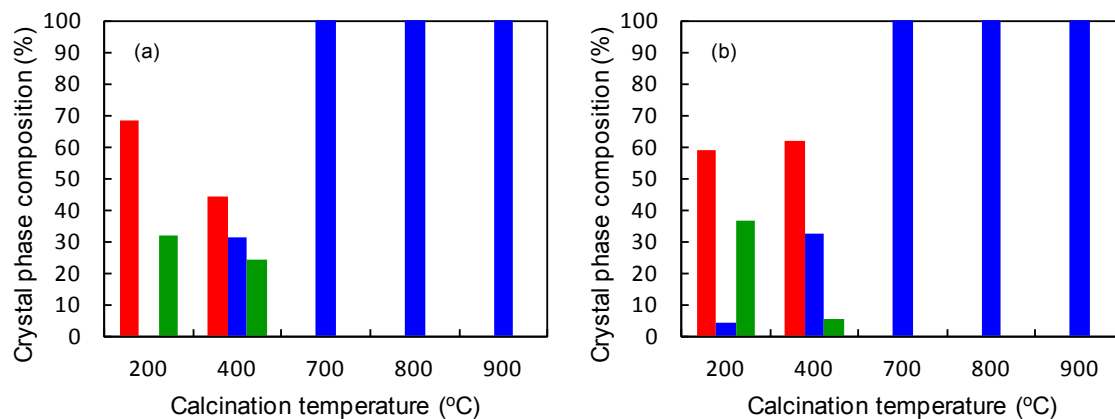

**Fig. S8** Crystalline phase composition of (a) TiO<sub>2</sub>-D and (b) TiO<sub>2</sub>-ND calcined 200–900°C for 10 hours. (Red: anatase, green: brookite, blue: rutile.)

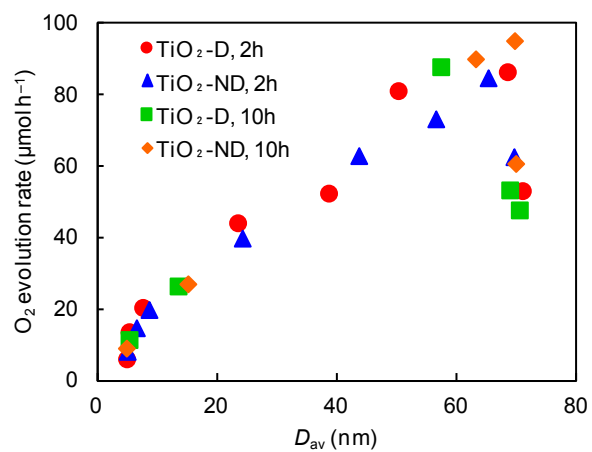

**Fig. S9** Relationships between  $D_{av}$  and  $O_2$  evolution rate on  $TiO_2$ -D and  $TiO_2$ -ND calcined at 200–900°C for 2 or 10 hours.
